# Supplementary material for: Triple therapy for COPD: a crude analysis from a systematic review of the evidence
Source: PubMed Central journal article supplement (PMC7000908; doi:10.1177/1753466619885522), 2019-11-06
Supplement: Online_supplement.pdf [file Online_supplement.pdf]

Table S1. Summary of the design of the trials with open triple combinations

| Studies                                                      | Design    | Treatment arms                       | Inhalers                                                       | Duration | Primary outcome                                                 | N * |
|--------------------------------------------------------------|-----------|--------------------------------------|----------------------------------------------------------------|----------|-----------------------------------------------------------------|-----|
| Multiple comparators                                         |           |                                      |                                                                |          |                                                                 |     |
| Hoshino M, Ohtawa J. Respiration 2013 <sup>1</sup>           | RCT       | FP/SAL + TIO<br>FP/SAL<br>SAL<br>TIO | Accuhaler + Handihaler<br>Accuhaler<br>Accuhaler<br>Handihaler | 16 weeks | Airway dimensions<br>by CT scan                                 | 68  |
| Aaron SD, et al. Ann Intern Med 2007<br>OPTIMAL <sup>2</sup> | RCT       | FP/SAL + TIO<br>SAL + TIO<br>TIO     | pMDI + Handihaler<br>pMDI + Handihaler<br>Handihaler           | 1 year   | % patients with an<br>exacerbation                              | 449 |
| Saito T, et al. Int J COPD 2015<br>EAGLE <sup>3</sup>        | Crossover | FP/SAL + TIO<br>FP/SAL<br>TIO        | Accuhaler + Handihaler<br>Accuhaler<br>Handihaler              | 4 weeks  | airway conductance<br>AUC <sub>0-4</sub>                        | 53  |
| Singh D, et al. Thorax 2008 <sup>4</sup>                     | Crossover | FP/SAL + TIO<br>FP/SAL<br>TIO        | Accuhaler + Handihaler<br>Accuhaler<br>Handihaler              | 2 weeks  | post-dose specific<br>airways conductance<br>AUC <sub>0-4</sub> | 30  |

| Studies                                            | Design | Treatment arms                | Inhalers                                          | Duration  | Primary outcome                   | N * |
|----------------------------------------------------|--------|-------------------------------|---------------------------------------------------|-----------|-----------------------------------|-----|
| Cazzola M, et al. Respir Med 2007 <sup>5</sup>     | RCT    | FP/SAL + TIO<br>FP/SAL<br>TIO | Accuhaler + Handihaler<br>Accuhaler<br>Handihaler | 3 months  | Trough FEV <sub>1</sub>           | 90  |
| Triple vs LAMA                                     |        |                               |                                                   |           |                                   |     |
| Hoshino M, Ohtawa J. Respirology 2011 <sup>6</sup> | RCT    | FP/SAL + TIO<br>TIO           | Accuhaler + Handihaler<br>Handihaler              | 142 weeks | Airway dimensions by CT scan      | 30  |
| Maltais F, et al. Eur Respir J 2013 <sup>7</sup>   | RCT    | FP/SAL + TIO<br>TIO           | Accuhaler + Handihaler<br>Handihaler              | 8 weeks   | Exercise endurance time           | 255 |
| Hanania N, et al. Respir Med 2012 <sup>8</sup>     | RCT    | FP/SAL + TIO<br>TIO           | Accuhaler + Handihaler<br>Handihaler              | 24 weeks  | Trough FEV <sub>1</sub>           | 342 |
| Jung KS, et al. Respir Med 2012 <sup>9</sup>       | RCT    | FP/SAL + TIO<br>TIO           | Accuhaler + Handihaler<br>Handihaler              | 24 weeks  | Trough FEV <sub>1</sub>           | 479 |
| Feng JF, et al. Medicine 2018 <sup>10</sup>        | RCT    | BUD/FORM + TIO<br>TIO         | Turbuhaler + handihaler<br>Handihaler             | 12 weeks  | Dyspnea on the 6-minute walk test | 113 |

| Studies                                                  | Design    | Treatment arms                        | Inhalers                                                      | Duration | Primary outcome                       | N *  |
|----------------------------------------------------------|-----------|---------------------------------------|---------------------------------------------------------------|----------|---------------------------------------|------|
| Lee SD, et al. Respirology 2015 <sup>11</sup>            | RCT       | BUD/FORM + TIO<br>TIO                 | Turbuhaler + handihaler<br>Handihaler                         | 12 weeks | Trough FEV <sub>1</sub>               | 578  |
| Williamson PA, et al. Chest 2010 <sup>12</sup>           | Crossover | BUD/FORM + TIO<br>TIO                 | Turbuhaler + handihaler<br>Handihaler                         | 2 weeks  | Trough FEV <sub>1</sub>               | 22   |
| Welte T, et al. AJRCCM 2009<br>CLIMB <sup>13</sup>       | RCT       | BUD/FOR + TIO<br>TIO                  | Turbuhaler + handihaler<br>Handihaler                         | 12 weeks | Trough FEV <sub>1</sub>               | 660  |
| Triple vs LABA/ICS                                       |           |                                       |                                                               |          |                                       |      |
| Frith PA, et al. Thorax 2015<br>GLISTEN <sup>14</sup>    | RCT       | FP/SAL + TIO<br>FP/SAL + GB<br>FP/SAL | Accuhaler + Handihaler<br>Accuhaler + Breezhaler<br>Accuhaler | 12 weeks | Trough FEV <sub>1</sub>               | 773  |
| Siler TM, et al. COPD 2016 <sup>15</sup>                 | RCT       | FP/SAL + UMEC<br>FP/SAL               | Accuhaler + Ellipta<br>Accuhaler                              | 12 weeks | Trough FEV <sub>1</sub>               | 1225 |
| Singh D, et al. Respir Med 2016<br>TRIDENT <sup>16</sup> | Crossover | BDP/FOR + GB<br>BDP/FOR               | pMDI + pMDI<br>pMDI                                           | 7 days   | FEV <sub>1</sub> AUC <sub>0-12h</sub> | 178  |

| Studies                                        | Design | Treatment arms        | Inhalers                     | Duration | Primary outcome         | N *  |
|------------------------------------------------|--------|-----------------------|------------------------------|----------|-------------------------|------|
| Siler TM, et al. Respir Med 2015 <sup>17</sup> | RCT    | FF/VI + UMEC<br>FF/VI | Ellipta + Ellipta<br>Ellipta | 12 weeks | Trough FEV <sub>1</sub> | 1238 |

\* N: referred to the number of subjects randomized to any of the treatment arms for RCT and referred to the complete population randomized for the crossover studies. RCT: Randomized controlled trial. BDP: beclomethasone dipropionate; FOR: formoterol fumarate; GB: glycopyrronium bromide; IND: indacaterol; FF: Fluticasone furoate; UMEC: umeclidinium; VI: vilanterol; BUD: budesonide; FOR: formoterol; TIO: tiotropium; SAL: salmeterol; FP: fluticasone propionate; FEV<sub>1</sub>: forced expiratory volume in the first second; SGRQ: St. George's Respiratory Questionnaire;; pMDI: pressured metered dose inhaler; AUC: Area under the curve; CT: computed tomography

Table S2. Summary of characteristics of the patients of the trials with open triple combinations

| Study                                                        | Age<br>(years) | Male<br>(%) | Smokers<br>(%) | ICS<br>(%) | FEV <sub>1</sub><br>(L) | FEV <sub>1</sub><br>(%) | Reversibility<br>(%) | Exac./yr | ≥ 2 exac.<br>(%) |
|--------------------------------------------------------------|----------------|-------------|----------------|------------|-------------------------|-------------------------|----------------------|----------|------------------|
| Multiple comparators                                         |                |             |                |            |                         |                         |                      |          |                  |
| Hoshino M, Ohtawa J. Respiration 2013 <sup>1</sup>           | 73             | 86.6        | –              | –          | 1.38                    | –                       | –                    | –        | –                |
| Aaron SD, et al. Ann Intern Med 2007<br>OPTIMAL <sup>2</sup> | 67.5           | 57.9        | 32.4           | 72.8       | 1.12                    | 42.2                    | –                    | – *      | – *              |
| Saito T, et al. Int J COPD 2015<br>EAGLE <sup>3</sup>        | 67.3           | 98          | 36             | –          | –                       | 59.3                    | 4.1                  | 0.1      | –                |
| Singh D, et al. Thorax 2008 <sup>4</sup>                     | 62.7           | 77.0        | 47.0           | 53.3       | –                       | 47.1                    | 6.78                 | 0.2      | –                |
| Cazzola M, et al. Respir Med 2007 <sup>5</sup>               | 66.9           | 86.6        | 80.0           | 66.6       | –                       | 39.0                    | 12.8                 | –        | –                |
| Triple vs LAMA                                               |                |             |                |            |                         |                         |                      |          |                  |
| Hoshino M, Ohtawa J. Respirology 2011 <sup>6</sup>           | 73             | 87.5        | –              | –          | 1.36                    | 64.6                    | –                    | –        | –                |
| Maltais F, et al. Eur Respir J 2013 <sup>7</sup>             | –              | –           | –              | –          | –                       | –                       | –                    | –        | –                |
| Hanania N, et al. Respir Med 2012 <sup>8</sup>               | 61.3           | 50.0        | 59.0           | –          | 1.67                    | –                       | –                    | –        | 6.3              |
| Jung KS, et al. Respir Med 2012 <sup>9</sup>                 | 67.0           | 97.3        | –              | –          | 1.22                    | 47.4                    | –                    | –        | –                |

| Study                                                   | Age<br>(years) | Male<br>(%) | Smokers<br>(%) | ICS<br>(%) | FEV <sub>1</sub><br>(L) | FEV <sub>1</sub><br>(%) | Reversibility<br>(%) | Exac./yr | ≥ 2 exac.<br>(%) |
|---------------------------------------------------------|----------------|-------------|----------------|------------|-------------------------|-------------------------|----------------------|----------|------------------|
| Feng JF, et al. Medicine 2018 <sup>10</sup>             | 64.9           | 77.8        | 54.0           | 52.8       | –                       | 45.1                    | –                    | –        | –                |
| Lee SD, et al. Respirology 2015 <sup>11</sup>           | 66.6           | 97.2        | –              | –          | –                       | 35.8                    | –                    | –        | –                |
| Williamson PA, et al. Chest 2010 <sup>12</sup>          | 65.0           | 63.1        | –              | –          | –                       | 42.0                    | –                    | –        | –                |
| Welte T, et al. AJRCCM 2009; CLIMB <sup>13</sup>        | 62.4           | 76.3        | 41.6           | 66.5       | 1.1                     | 38.1                    | 5.9                  | 1.4      | –                |
| Triple vs LABA/ICS                                      |                |             |                |            |                         |                         |                      |          |                  |
| Frith PA, et al. Thorax 2015; GLISTEN <sup>14</sup> **  | 68.0           | 62.0        | 35.7           | 66.3       | 1.55                    | 57.35                   | 22.41                | –        | 35.7 (> 1)       |
| Siler TM, et al. COPD 2016 <sup>15</sup> Study 1        | 62.7           | 65.0        | 50.0           | 55.0       | 1.31                    | 46.8                    | 16.2                 | –        | –                |
| Siler TM, et al. COPD 2016 <sup>15</sup> Study 2        | 64.5           | 69.0        | 36.0           | 59.0       | 1.15                    | 43.9                    | 16.1                 | –        | –                |
| Singh D, et al. Respir Med 2016; TRIDENT <sup>16</sup>  | 62.7           | 66.9        | 54.5           | –          | 1.41                    | 48.9                    | 16.4                 | –        | –                |
| Siler TM, et al. Respir Med 2015 <sup>17</sup> Study 1  | 64.9           | 67.4        | 39.3           | –          | –                       | 44.2                    | 14.8                 | –        | –                |
| Siler TM, et al. Respir Med 2015 <sup>17</sup> Study 12 | 62.6           | 65.5        | 58.2           | –          | –                       | 46.3                    | 13.2                 | –        | –                |

Results referred to the triple therapy arm in randomized controlled trials and for the complete population in crossover studies.

\* At least 1 exacerbation of COPD that required treatment with systemic steroids or antibiotics within the 12 months before randomization, as per protocol

\*\* Results referred to the salmeterol/fluticasone + tiotropium combination.

Table S3. Description of the main adverse effects with BDP/FF/GB fixed-dose triple therapy expressed as percentages

|                                                  | TRILOGY <sup>18</sup> | TRINITY <sup>19</sup> | TRIBUTE <sup>20</sup> |
|--------------------------------------------------|-----------------------|-----------------------|-----------------------|
| <b>Treatment-emergent adverse events</b>         | <b>54</b>             | <b>55</b>             | <b>64</b>             |
| COPD                                             | 31                    | 33                    | 36                    |
| Nasopharyngitis                                  | 6                     | 5                     | 6                     |
| Pneumonia                                        | 3                     | 3                     | 4                     |
| Hypertension                                     | 3                     |                       | 2                     |
| Headache                                         | 2                     | 4                     | 6                     |
| Ischaemic heart disease                          | 1                     | 2                     |                       |
| Viral respiratory tract infection                | 2                     | 1                     | 3                     |
| Oral candidiasis                                 | 2                     |                       |                       |
| Cough                                            |                       | 2                     | 2                     |
| Dyspnoea                                         |                       |                       | 3                     |
| Back pain                                        |                       |                       | 3                     |
| Cardiac failure                                  |                       |                       | 2                     |
| Ischaemic heart disease                          |                       |                       | 1                     |
|                                                  |                       |                       |                       |
| <b>Serious treatment-emergent adverse events</b> | <b>15</b>             | <b>13</b>             | <b>15</b>             |
| COPD                                             | 10                    | 7                     | 8                     |
| Pneumonia                                        | 2                     | 2                     | 2                     |
| Ischaemic heart disease                          | <1                    | 1                     | <1                    |
| Cardiac failure                                  | 1                     | <1                    | 1                     |
| Death                                            |                       |                       | <1                    |
| Atrial fibrillation                              |                       |                       | 0                     |
| Respiratory failure                              |                       |                       | <1                    |



|                                                                                |              |          |              |
|--------------------------------------------------------------------------------|--------------|----------|--------------|
| Lung neoplasm                                                                  |              |          | 1            |
|                                                                                |              |          |              |
| <b>Treatment-related adverse events</b>                                        | <b>4</b>     | <b>2</b> | <b>6</b>     |
| Oral candidiasis                                                               | 1            | <1       | 2            |
| Muscle spasms                                                                  | 1            | 1        |              |
| Dry mouth                                                                      | 1            | <1       | <1           |
| Dysphonia                                                                      |              | <1       |              |
| Cough                                                                          |              |          | <1           |
|                                                                                |              |          |              |
| <b>Serious treatment-related adverse events</b>                                | <b>&lt;1</b> | <b>0</b> | <b>&lt;1</b> |
|                                                                                |              |          |              |
| <b>Severe treatment-related adverse events</b>                                 | <b>11</b>    | <b>8</b> | <b>11</b>    |
|                                                                                |              |          |              |
| <b>Treatment-emergent adverse events leading to study drug discontinuation</b> | <b>5</b>     | <b>3</b> | <b>5</b>     |
|                                                                                |              |          |              |
| <b>Treatment-emergent adverse events leading to death</b>                      | <b>2</b>     | <b>2</b> | <b>2</b>     |
|                                                                                |              |          |              |
| <b>MACE (Major adverse cardiovascular events)</b>                              | <b>2</b>     | <b>2</b> |              |

\* MACE: Major adverse cardiovascular events, includes acute myocardial infarction, arrhythmias, cardiovascular death, heart failure, and stroke. Treatment emergent adverse effects were those captured throughout the study. Treatment-related adverse effects were all events judged by the investigator as having reasonable causal association to a medical product.

Table S4. Description of the main adverse effects with FF/UMEC/VI fixed-dose triple therapy expressed as percentages.

|                                                         | FULFIL <sup>21</sup> | IMPACT <sup>22</sup> |
|---------------------------------------------------------|----------------------|----------------------|
| Adverse events of special interest*                     |                      |                      |
| Cardiovascular effects                                  | 4.3                  | 11                   |
| Pneumonia                                               | 2.2                  | 8                    |
| Local steroid effects                                   | 2.1                  |                      |
| Anticholinergic syndrome                                | 1.8                  | 4                    |
| Hypersensitivity                                        | 1.1                  |                      |
| Hyperglycemia/diabetes                                  | 0.5                  |                      |
| Decreased bone mineral density                          | 0.4                  |                      |
| lower respiratory tract infection (excluding pneumonia) | 0.3                  | 5                    |
| Ocular effects                                          | 0.1                  |                      |
| Urinary retention                                       | 0.1                  |                      |
| Asthma/bronchospasm                                     | 0                    | <1                   |
| Cardiovascular effects                                  | 11                   |                      |
| Urinary retention                                       |                      | <1                   |

\* Adverse events of special interest are based on an analysis of a group of prespecified adverse events that are associated with the use of inhaled glucocorticoids, long-acting muscarinic antagonists, or long-acting  $\beta_2$ -agonists

Table S5. Description of the main adverse effects with BUD/FOR/GB fixed-dose triple therapy expressed as percentages.

|                                       | KRONOS <sup>23</sup> |
|---------------------------------------|----------------------|
| Nasopharyngitis                       | 8                    |
| Upper respiratory tract infection     | 10                   |
| Chronic obstructive pulmonary disease | 3                    |
| Bronchitis                            | 3                    |
| Muscle spasms                         | 3                    |
| Dysphonia                             | 3                    |
| Hypertension                          | 2                    |
| Dyspnea                               | 1                    |
| Back pain                             | 1                    |
| Nausea                                | 1                    |



## References

1. Hoshino M and Ohtawa J. Effects of tiotropium and salmeterol/fluticasone propionate on airway wall thickness in chronic obstructive pulmonary disease. *Respiration; international review of thoracic diseases* 2013; 86: 280-287. DOI: 10.1159/000351116.
2. Aaron SD, Vandemheen KL, Fergusson D, et al. Tiotropium in combination with placebo, salmeterol, or fluticasone-salmeterol for treatment of chronic obstructive pulmonary disease: a randomized trial. *Annals of internal medicine* 2007; 146: 545-555. DOI: 10.7326/0003-4819-146-8-200704170-00152.
3. Saito T, Takeda A, Hashimoto K, et al. Triple therapy with salmeterol/fluticasone propionate 50/250 plus tiotropium bromide improve lung function versus individual treatments in moderate-to-severe Japanese COPD patients: a randomized controlled trial - Evaluation of Airway sGaw after treatment with tripLE. *International journal of chronic obstructive pulmonary disease* 2015; 10: 2393-2404. DOI: 10.2147/COPD.S89948.
4. Singh D, Brooks J, Hagan G, et al. Superiority of "triple" therapy with salmeterol/fluticasone propionate and tiotropium bromide versus individual components in moderate to severe COPD. *Thorax* 2008; 63: 592-598. 2008/02/05. DOI: 10.1136/thx.2007.087213.
5. Cazzola M, Ando F, Santus P, et al. A pilot study to assess the effects of combining fluticasone propionate/salmeterol and tiotropium on the airflow obstruction of patients with severe-to-very severe COPD. *Pulmonary pharmacology & therapeutics* 2007; 20: 556-561. DOI: 10.1016/j.pupt.2006.06.001.
6. Hoshino M and Ohtawa J. Effects of adding salmeterol/fluticasone propionate to tiotropium on airway dimensions in patients with chronic obstructive pulmonary disease. *Respirology* 2011; 16: 95-101. DOI: 10.1111/j.1440-1843.2010.01869.x.
7. Maltais F, Mahler DA, Pepin V, et al. Effect of fluticasone propionate/salmeterol plus tiotropium versus tiotropium on walking endurance in COPD. *The European respiratory journal : official journal of the European Society for Clinical Respiratory Physiology* 2013; 42: 539-541. DOI: 10.1183/09031936.00074113.
8. Hanania NA, Crater GD, Morris AN, et al. Benefits of adding fluticasone propionate/salmeterol to tiotropium in moderate to severe COPD. *Respiratory medicine* 2012; 106: 91-101. DOI: 10.1016/j.rmed.2011.09.002.
9. Jung KS, Park HY, Park SY, et al. Comparison of tiotropium plus fluticasone propionate/salmeterol with tiotropium in COPD: a randomized controlled study. *Respiratory medicine* 2012; 106: 382-389. DOI: 10.1016/j.rmed.2011.09.004.
10. Feng JF, Ding GR, Xie YZ, et al. Efficacy of budesonide/formoterol and tiotropium combination for the treatment of Chinese patients with chronic obstructive pulmonary disease. *Medicine (Baltimore)* 2018; 97: e10841. DOI: 10.1097/MD.00000000000010841.
11. Lee SD, Xie CM, Yunus F, et al. Efficacy and tolerability of budesonide/formoterol added to tiotropium compared with tiotropium alone in patients with severe or very severe COPD: A randomized, multicentre study in East Asia. *Respirology* 2016; 21: 119-127. DOI: 10.1111/resp.12646.
12. Williamson PA, Short PM, Clearie KL, et al. Paradoxical trough effects of triple therapy with budesonide/formoterol and tiotropium bromide on pulmonary function outcomes in COPD. *Chest* 2010; 138: 595-604. DOI: 10.1378/chest.10-0247.
13. Welte T, Miravittles M, Hernandez P, et al. Efficacy and tolerability of budesonide/formoterol added to tiotropium in patients with chronic obstructive pulmonary disease. *American journal of respiratory and critical care medicine* 2009; 180: 741-750. DOI: 10.1164/rccm.200904-0492OC.
14. Frith PA, Thompson PJ, Ratnavadivel R, et al. Glycopyrronium once-daily significantly improves lung function and health status when combined with salmeterol/fluticasone in patients with COPD: the GLISTEN study, a randomised

controlled trial. *Thorax* 2015; 70: 519-527. 2015/04/05. DOI: 10.1136/thoraxjnl-2014-206670.

15. Siler TM, Kerwin E, Singletary K, et al. Efficacy and Safety of Umeclidinium Added to Fluticasone Propionate/Salmeterol in Patients with COPD: Results of Two Randomized, Double-Blind Studies. *Copd* 2016; 13: 1-10. DOI: 10.3109/15412555.2015.1034256.

16. Singh D, Schroder-Babo W, Cohuet G, et al. The bronchodilator effects of extrafine glycopyrronium added to combination treatment with beclometasone dipropionate plus formoterol in COPD: A randomised crossover study (the TRIDENT study). *Respiratory medicine* 2016; 114: 84-90. DOI: 10.1016/j.rmed.2016.03.018.

17. Siler TM, Kerwin E, Sousa AR, et al. Efficacy and safety of umeclidinium added to fluticasone furoate/vilanterol in chronic obstructive pulmonary disease: Results of two randomized studies. *Respiratory medicine* 2015; 109: 1155-1163. DOI: 10.1016/j.rmed.2015.06.006.

18. Singh D, Papi A, Corradi M, et al. Single inhaler triple therapy versus inhaled corticosteroid plus long-acting beta2-agonist therapy for chronic obstructive pulmonary disease (TRILogy): a double-blind, parallel group, randomised controlled trial. *Lancet* 2016; 388: 963-973. DOI: 10.1016/S0140-6736(16)31354-X.

19. Vestbo J, Papi A, Corradi M, et al. Single inhaler extrafine triple therapy versus long-acting muscarinic antagonist therapy for chronic obstructive pulmonary disease (TRINITY): a double-blind, parallel group, randomised controlled trial. *Lancet* 2017; 389: 1919-1929. DOI: 10.1016/S0140-6736(17)30188-5.

20. Papi A, Vestbo J, Fabbri L, et al. Extrafine inhaled triple therapy versus dual bronchodilator therapy in chronic obstructive pulmonary disease (TRIBUTE): a double-blind, parallel group, randomised controlled trial. *Lancet* 2018; 391: 1076-1084. DOI: 10.1016/S0140-6736(18)30206-X.

21. Lipson DA, Barnacle H, Birk R, et al. FULFIL Trial: Once-Daily Triple Therapy for Patients with Chronic Obstructive Pulmonary Disease. *American journal of respiratory and critical care medicine* 2017; 196: 438-446. DOI: 10.1164/rccm.201703-0449OC.

22. Lipson DA, Barnhart F, Brealey N, et al. Once-Daily Single-Inhaler Triple versus Dual Therapy in Patients with COPD. *The New England journal of medicine* 2018; 378: 1671-1680. DOI: 10.1056/NEJMoa1713901.

23. Ferguson GT, Rabe KF, Martinez FJ, et al. Triple therapy with budesonide/glycopyrrolate/formoterol fumarate with co-suspension delivery technology versus dual therapies in chronic obstructive pulmonary disease (KRONOS): a double-blind, parallel-group, multicentre, phase 3 randomised controlled trial. *The lancet Respiratory medicine* 2018; 6: 747-758. 2018/09/21. DOI: 10.1016/s2213-2600(18)30327-8.
